# Supplementary material
Source: PubMed Central journal article supplement (PMC4109532)
Supplement: JCI71668sd.pdf [file JCI71668sd.pdf]

## **Supplemental Material**

### **Integrin-mediated type II TGF- $\beta$ receptor tyrosine dephosphorylation controls SMAD-dependent profibrotic signaling**

Chen X et al.

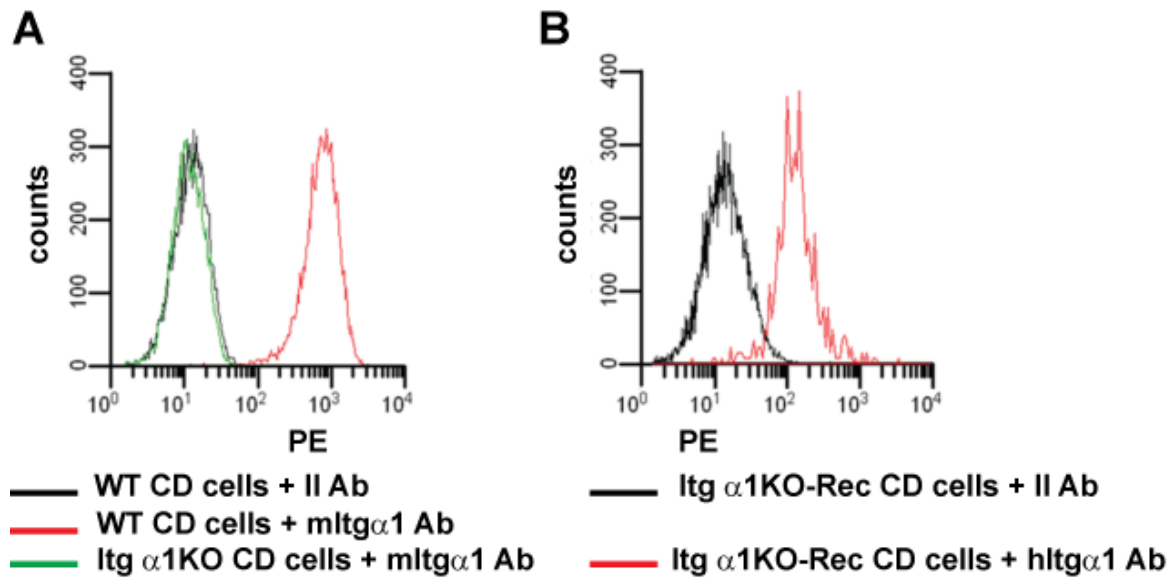

### Supplemental Figure 1

**FACS analysis of WT, integrin  $\alpha$ 1KO, and integrin  $\alpha$ 1KO-Rec CD cells.** (A) Wild type (WT) and integrin  $\alpha$ 1KO primary CD cells were incubated with antibodies to mouse integrin  $\alpha$ 1 subunit (mItga1) or secondary antibody only (II Ab). Integrin expression is displayed by a shift in mean fluorescent intensity relative to no primary antibody incubation using fluorescence-activated cell sorting analysis (PE, Phycoerythrin). (B) Integrin  $\alpha$ 1KO CD cells reconstituted with the human integrin  $\alpha$ 1 subunit ( $\alpha$ 1KO-Rec) were incubated with antibodies to human integrin  $\alpha$ 1 subunit (hltg $\alpha$ 1) or secondary antibody only (II Ab) and analyzed as described above.

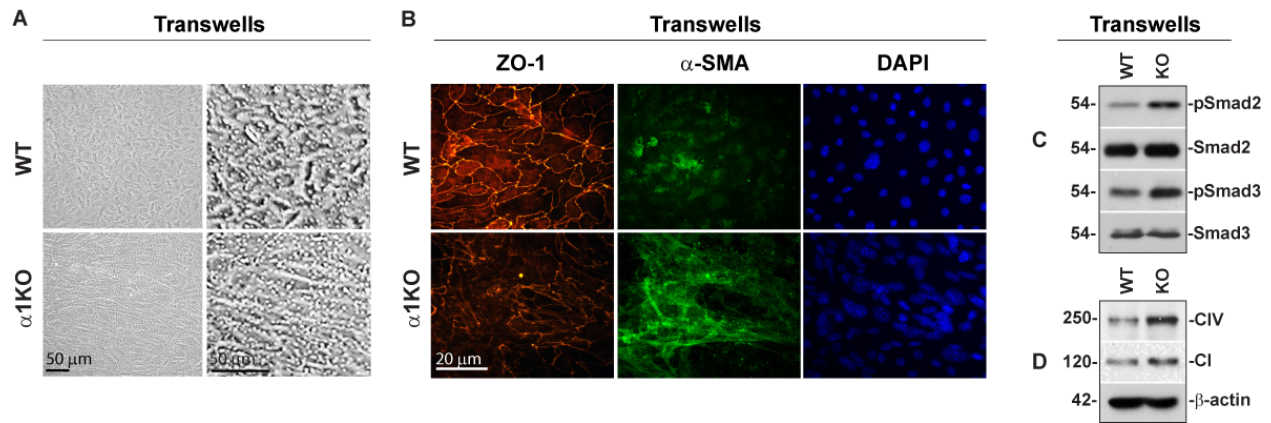

### Supplemental Figure 2

**Characterization of CD cells grown on transwells.** (A) Morphology of wild type (WT) and integrin  $\alpha$ 1KO CD cells cultured in complete medium on transwells for 3 days. (B) The CD cells indicated were grown on transwells in complete medium for 3 days and then stained with anti-ZO-1 and anti- $\alpha$ SMA antibodies to visualize levels and localization of epithelial and myofibroblast markers. (C, D) The cells indicated were grown in complete medium on transwells. Three days later the cells were serum starved for 24 hours and then analyzed by Western blot for levels of activated and total Smad2 and Smad3, as well as collagen I and collagen IV levels (20  $\mu$ g/lane total cell lysates were used for analysis).

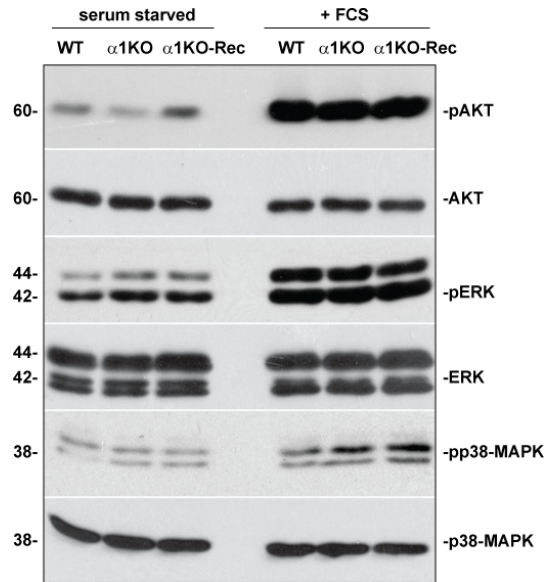

**Supplemental Figure 3**

**Analysis of TGF- $\beta$  non-canonical signaling in CD cells.** The CD cells indicated were grown on plastic in complete medium. After 3 days they were serum starved for 24 hours and either left untreated or treated with 10% FCS (used as positive control) for 30 minutes. Cell lysates (20  $\mu$ g/lane) were analyzed by western blot for levels of phosphorylated and total AKT, ERK and p38-MAPK.

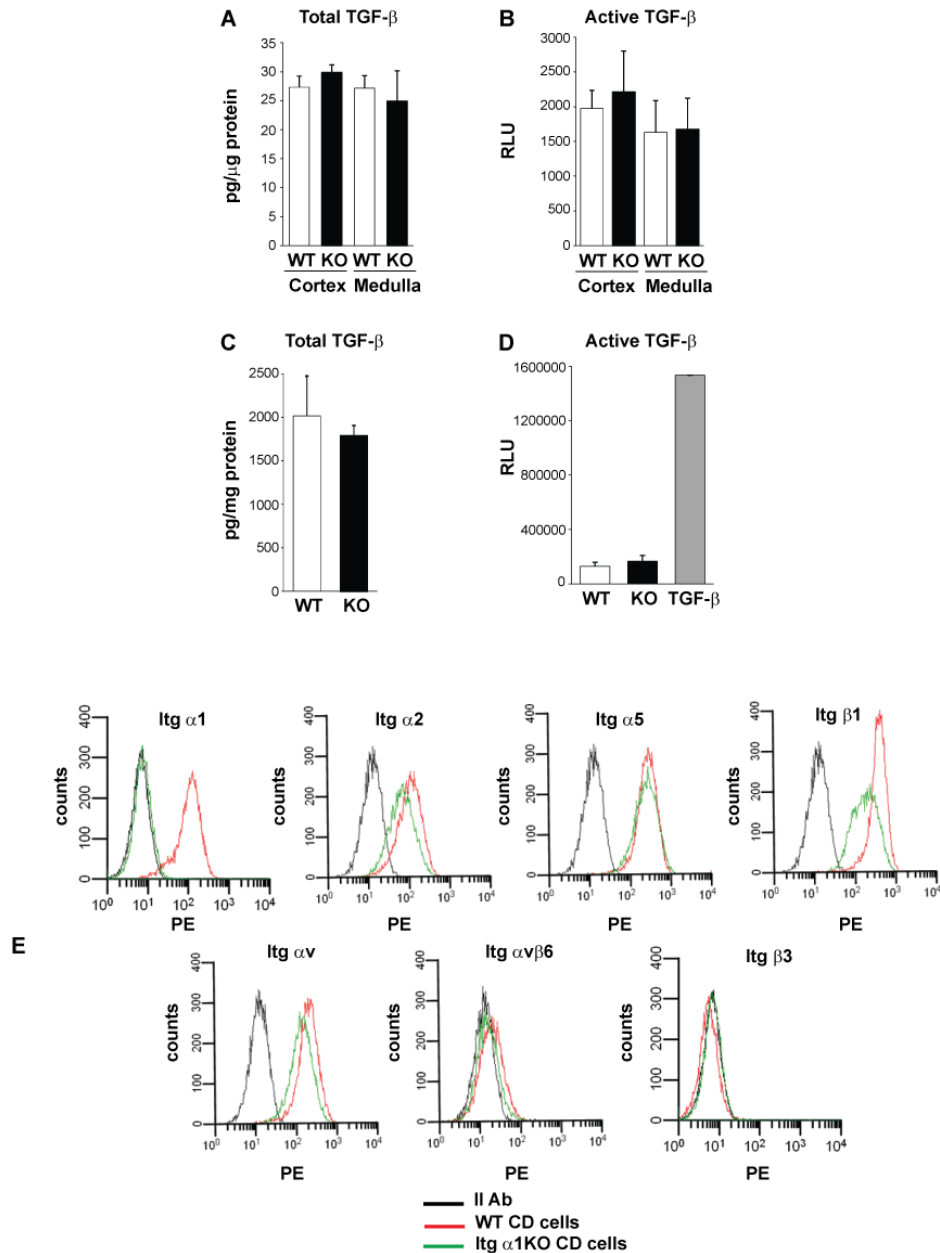

#### Supplemental Figure 4

**Analysis of TGF- $\beta$ 1 levels and integrin profile in WT and integrin  $\alpha$ 1KO CD cells and mice.** (A-D) Total levels of TGF- $\beta$ 1 and bioactive levels of TGF- $\beta$  (all isoforms) were analyzed in kidneys of wild type (WT) and integrin  $\alpha$ 1KO mice 7 days after UUO as well as from 3-day-conditioned medium from WT and integrin  $\alpha$ 1KO CD cells by ELISA (A, C) and PAI/L assays (B, D). The values in A and B represent the mean  $\pm$  s.d. of 3 mice per genotype. The values in C and D represent the mean  $\pm$  s.d. of one representative experiment performed in quadruplicate. Three independent experiments were performed with similar results. (E) Integrin expression by WT and integrin  $\alpha$ 1KO CD cells. Cells were incubated with antibodies to  $\alpha$ 1,  $\alpha$ 2,  $\alpha$ 5,  $\alpha$ v,  $\beta$ 1,  $\beta$ 3, or  $\alpha$ v $\beta$ 6 integrin subunits. Integrin expression is displayed by a shift in mean fluorescent intensity compared with no primary antibody incubation using fluorescence-activated cell sorting analysis (PE, Phycoerythrin).

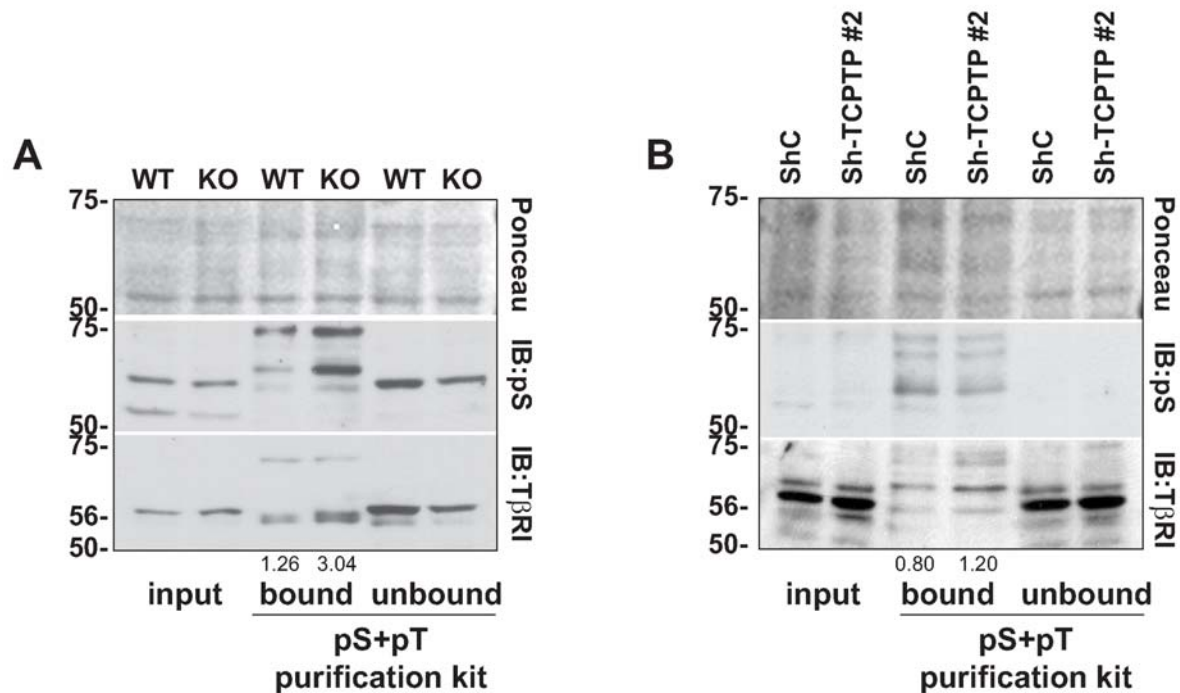

**Supplemental Figure 5**

**Analysis of serine and threonine phosphorylated T $\beta$ RI in CD cells.** Cell lysates (0.5 mg) from serum-starved WT and integrin  $\alpha$ 1KO CD cells (**A**) or WT CD cells transfected with shRNAi control (ShC) or TCPTP shRNAi (Sh-TCPTP) (1 clone each shown) (**B**) were immunoprecipitated using the phosphoserine/phosphothreonine protein purification columns (Qiagen, #37101). Bound and unbound proteins were then analyzed by Western blot for levels of phosphoserine products and T $\beta$ RI. A band corresponding to T $\beta$ RI (~56kDa) was more prominent in integrin  $\alpha$ 1KO and sh-TCPTP transfected CD cell lysates bound to the purification columns (lower panel). Serine phosphorylated products with molecular weights 50-75 kDa were detected with anti-phosphoserine antibodies (middle panel). The values represent the intensity of the T $\beta$ RI band normalized to the intensity of the 50 kDa band detected in the Ponceau staining.

**A**

```

MGRGLLRGLWPLHIVLWTRIASTIPPHVQKSVNNDMIVTDNNGAVKFPQLCKFC
DVRFSTCDNQKSCMSNCSITSICEKPQEVCAVWRKNDENITLETVCHDPKLPY
HDFILEDAAASPKCIMKEKKKPGETFFMCSSCSDECDNIIIFSEEYNTSNPDLLVI
FQVTGISLLPPLGVAISVIIIFCYRVNRQQKLSSTWETGKTRKLMFSEHCAIILE
DDRSDISSTCANNINHNTPELLIEDTLVGKGRFAEVYKAKLKQNTSEQFETVAV
KIFPYEEYASWKTEKDIFSDINLKHENILQFLTAERKTELKGQYWLITAFHAKGN
LQEYLTRHVISWEDLRKLGSSSLARGIAHLHSDHTPCGRPKMPIVHRDLKSSNILV
KNDLTCCLCDFGLSLRLDPTLSVDDLANSQGQVGTARYMAPEVLESRMNLENVE
SFKQTDVYSMALVLWEMTSRCNAVGEVKDYEPFPGSKVREHPCVESMKDNVL
RDRGRPEIPSWFLNHQGIQMVCELTTECWDHDPPEARLTAQCVAERFSELEHLD
RLSGR SCSEEEKIPEDGSLNTTK

```

**B**

|                    | Position | sequence  | Y phosphorylation sites | Features of Y phosphorylation sites |                        |
|--------------------|----------|-----------|-------------------------|-------------------------------------|------------------------|
| cytoplasmic domain | 1        | 151 - 153 | EEY                     | [E/D]XpY                            | SHP1 substrate motif   |
|                    | 2        | 151 - 154 | EEYN                    | X[E/D]pYX                           | EGFR substrate motif   |
|                    | 3        | 152 - 153 | EY                      | [E/D/Y]pY                           | TC-PTP substrate motif |
|                    | 4        | 257 - 259 | EVY                     | [E/D]XpY                            | SHP1 substrate motif   |
|                    | 5        | 281 - 282 | YE                      | pY[A/G/S/T/E/D]                     | Src substrate motif    |
|                    | 6        | 282 - 284 | EEY                     | [E/D]XpY                            | SHP1 substrate motif   |
|                    | 7        | 282 - 285 | EEYA                    | X[E/D]pYX                           | EGFR substrate motif   |
|                    | 8        | 283 - 284 | EY                      | [E/D/Y]pY                           | TC-PTP substrate motif |
|                    | 9        | 284 - 285 | YA                      | pY[A/G/S/T/E/D]                     | Src substrate motif    |
|                    | 10       | 321 - 324 | YWLI                    | pYXX[L/I/V]                         | JAK2 substrate motif   |
|                    | 11       | 334 - 337 | QEYL                    | X[E/D]pYX                           | EGFR substrate motif   |
|                    | 12       | 334 - 337 | QEYL                    | X[E/D]pY[I/L/V]                     | EGFR substrate motif   |
|                    | 13       | 335 - 336 | EY                      | [E/D/Y]pY                           | TC-PTP substrate motif |
|                    | 14       | 446 - 448 | DVY                     | [E/D]XpY                            | SHP1 substrate motif   |
|                    | 15       | 448 - 449 | YS                      | pY[A/G/S/T/E/D]                     | Src substrate motif    |
|                    | 16       | 468 - 471 | KDYE                    | X[E/D]pYX                           | EGFR substrate motif   |
|                    | 17       | 469 - 470 | DY                      | [E/D/Y]pY                           | TC-PTP substrate motif |
|                    | 18       | 470 - 471 | YE                      | pY[A/G/S/T/E/D]                     | Src substrate motif    |

**C**

```

Mouse 215-RVHRQQKLSPSWESSKPRKLMDFSDNCAIILEDDDRSDISSTCANNINHNTPELLIEDTLVGKGRFAEVYKAKLKQNTSE
Human 190-RVNRQQKLSSTWETGKTRKLMFSEHCAIILEDDDRSDISSTCANNINHNTPELLIEDTLVGKGRFAEVYKAKLKQNTSE

QFETVAVKIFPYEEYSSWKTEKDIFSDINLKHENILQFLTAERKTELKGQYWLITAFHAKGNLQEYLTRHVISWEDLRKLG
QFETVAVKIFPYEEYASWKTEKDIFSDINLKHENILQFLTAERKTELKGQYWLITAFHAKGNLQEYLTRHVISWEDLRKLG
SSSLARGIAHLHSDHTPCGRPKMPIVHRDLKSSNILVKNDLTCCLCDFGLSLRLDPTLSVDDLANSQGQVGTARYMAPEVLE
SSSLARGIAHLHSDHTPCGRPKMPIVHRDLKSSNILVKNDLTCCLCDFGLSLRLDPTLSVDDLANSQGQVGTARYMAPEVLE
SRMNLENVESFKQTDVYSMALVLWEMTSRCNAVGEVKDYEPFPGSKVREHPCVESMKDSDLRDRGR-507
SRMNLENVESFKQTDVYSMALVLWEMTSRCNAVGEVKDYEPFPGSKVREHPCVESMKDNVLRDRGR-497

```

### Supplemental Figure 6

The human T $\beta$ RII cytoplasmic domain contains TCPTP substrate motifs. The PhosphoMotif Finder ([http://www.hprd.org/PhosphoMotif\\_finder](http://www.hprd.org/PhosphoMotif_finder)) was used to identify potential tyrosine kinase and tyrosine phosphatase motifs in the human T $\beta$ RII cDNA (full-length sequence indicated in A). Analysis revealed 18 potential tyrosine phosphorylatable sites of which 3, located in the cytoplasmic domain and highlighted in yellow (Y284), green (Y336) and blue (Y470), are TCPTP dephosphorylation substrates (B). Note that although Y424 (in the black box in A) has been described as a potential phosphorylatable tyrosine (6), it does not appear in the list as it does not contain typical tyrosine phosphorylation and/or dephosphorylation motifs. (C) Portion of the mouse (red) and human (black) T $\beta$ RII cytoplasmic domain showing 5 highly conserved phosphorylatable tyrosines.



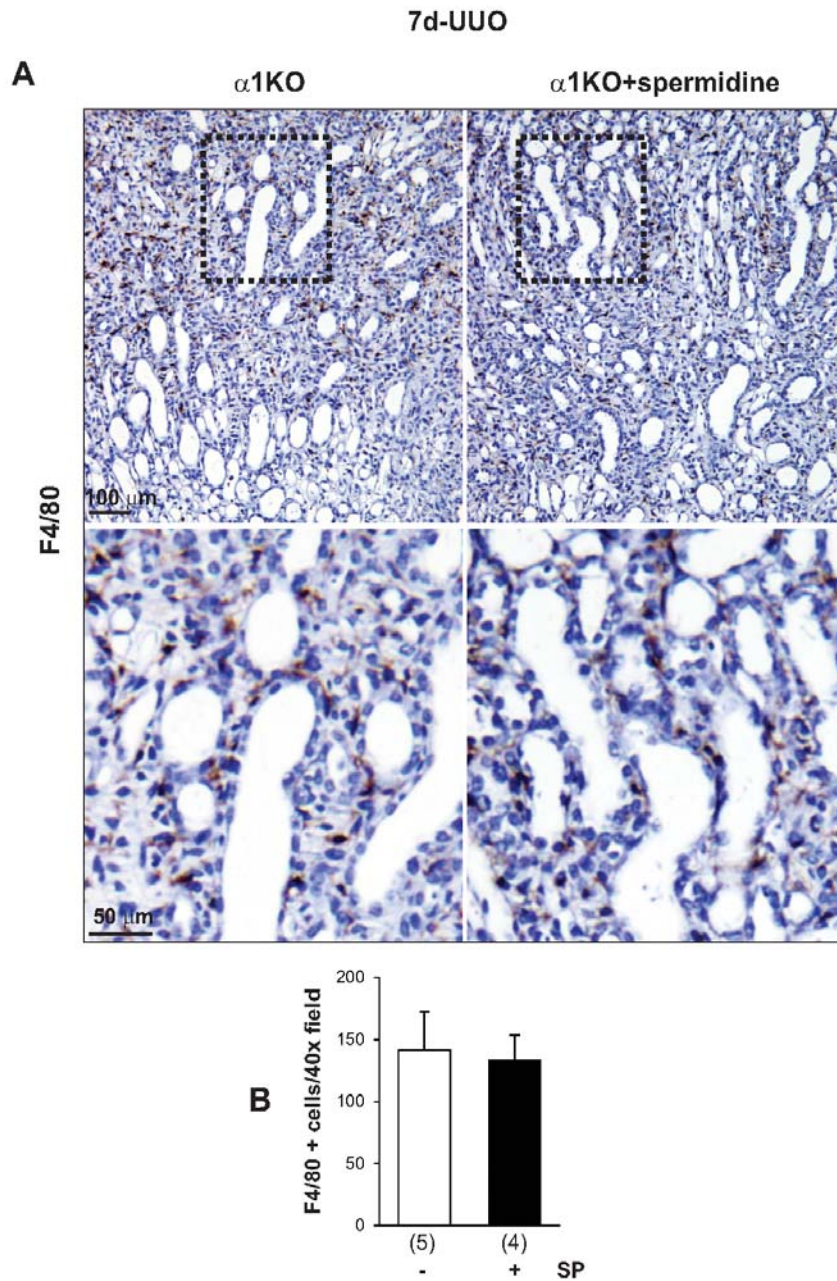

**Supplemental Figure 7**

**Evaluation of macrophage infiltration in the kidneys of UUO-injured integrin  $\alpha$ 1KO mice untreated or treated with spermidine.** (A) Paraffin sections of kidneys from integrin  $\alpha$ 1KO mice untreated or treated with spermidine (30 mM via gavage) at 7 days post-UUO were stained with anti-F4/80 antibodies. (B) The number of macrophages in spermidine treated and untreated mice was evaluated and expressed as F4/80 positive cells/microscopic field. Values are the mean  $\pm$  sem of the mice indicated in parenthesis (5 field/kidney were counted).



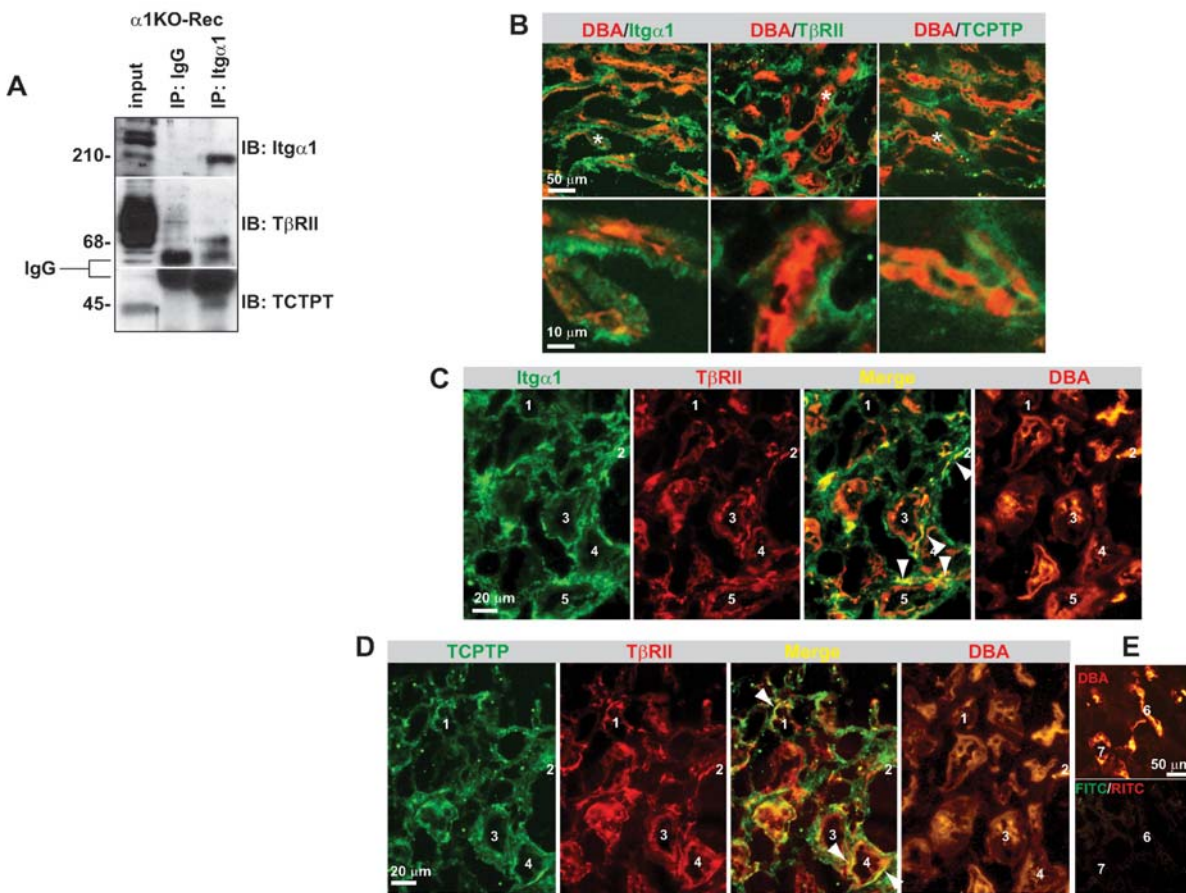

### Supplemental Figure 8

**T $\beta$ RII forms a complex with integrin  $\alpha 1\beta 1$  and TCPTP.** (A) Cell lysates (0.5 mg) derived from integrin  $\alpha 1$ KO CD cells expressing the human integrin  $\alpha 1$  subunit ( $\alpha 1$ KO-Rec) were incubated with either anti-human integrin  $\alpha 1$  antibodies (20  $\mu$ g) or mouse IgG isotype controls (20  $\mu$ g), followed by incubation with Protein G beads. The immunoprecipitation complexes were analyzed by Western blot, and products were detected with antibodies to the human integrin  $\alpha 1$  subunit (Itg $\alpha 1$ ), T $\beta$ RII, and TCPTP. (B-D) Human kidney frozen sections (5  $\mu$ m) were stained with Dolichos Biflorus Agglutinin (DBA, red) and mouse anti-human integrin  $\alpha 1$  (green), rabbit anti-human T $\beta$ RII (green) and mouse anti-human TCPTP antibodies (green) to evaluate expression of these proteins in collecting ducts. The asterisk indicates ducts magnified and shown in the lower panel. (C, D) Human kidney serial frozen sections were stained with mouse anti-human integrin  $\alpha 1$  (green) together with rabbit anti-human T $\beta$ RII (red) (C); mouse anti-human TCPTP (green) together with rabbit anti-human T $\beta$ RII (red) (D); or DBA alone (red) (C, D) to evaluate integrin  $\alpha 1$ /T $\beta$ RII and T $\beta$ RII/TCPTP co-localization (arrowhead) within collecting ducts (indicated by the numbers 1-5). (E) Human kidney serial frozen sections (5  $\mu$ m) were stained with DBA alone (red) or with FITC-conjugated anti-mouse together with RITC-conjugated anti-rabbit antibodies to evaluate background staining in collecting ducts (indicated by the numbers 6 and 7).

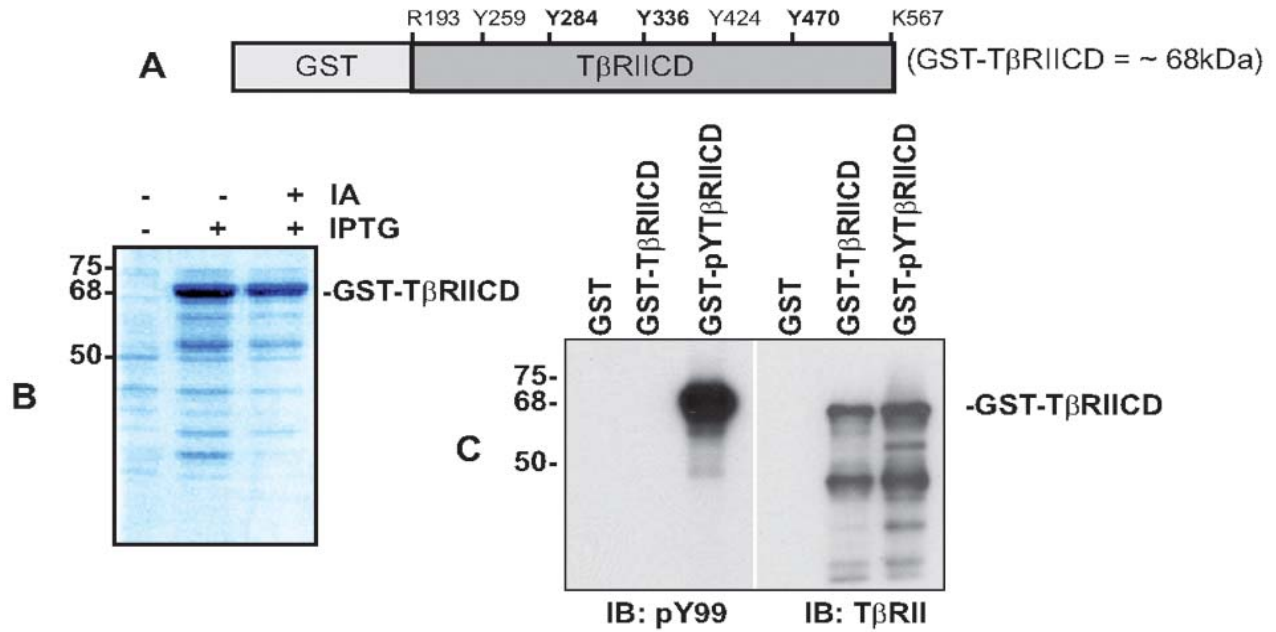

### Supplemental Figure 9

**Generation of TβRII cytoplasmic domain constructs.** (A) Schematic representation of the 68 kDa GST-TβRII construct used to generate non-phosphorylated and tyrosine phosphorylated human GST-TβRII cytoplasmic domain (CD, R193-K567). This domain contains 5 potential phosphorylatable tyrosines, of which 3 (in bold) are potential TCPTP dephosphorylation sites. (B) Coomassie staining showing expression of bacterial non-phosphorylated (-IA, indoleacrylic acid) and tyrosine phosphorylated (+IA) GST-TβRIICD upon induction with isopropyl β-d-thiogalactoside (IPTG). (C) Purified GST, unphosphorylated GST-TβRIICD or tyrosine phosphorylated GST-pYTβRIICD constructs were analyzed by Western blot for levels of tyrosine phosphorylation (IB:pY99) or expression levels (IB:TβRII). The GST-pYTβRIICD construct (68 kDa) is highly phosphorylated on tyrosine residues.

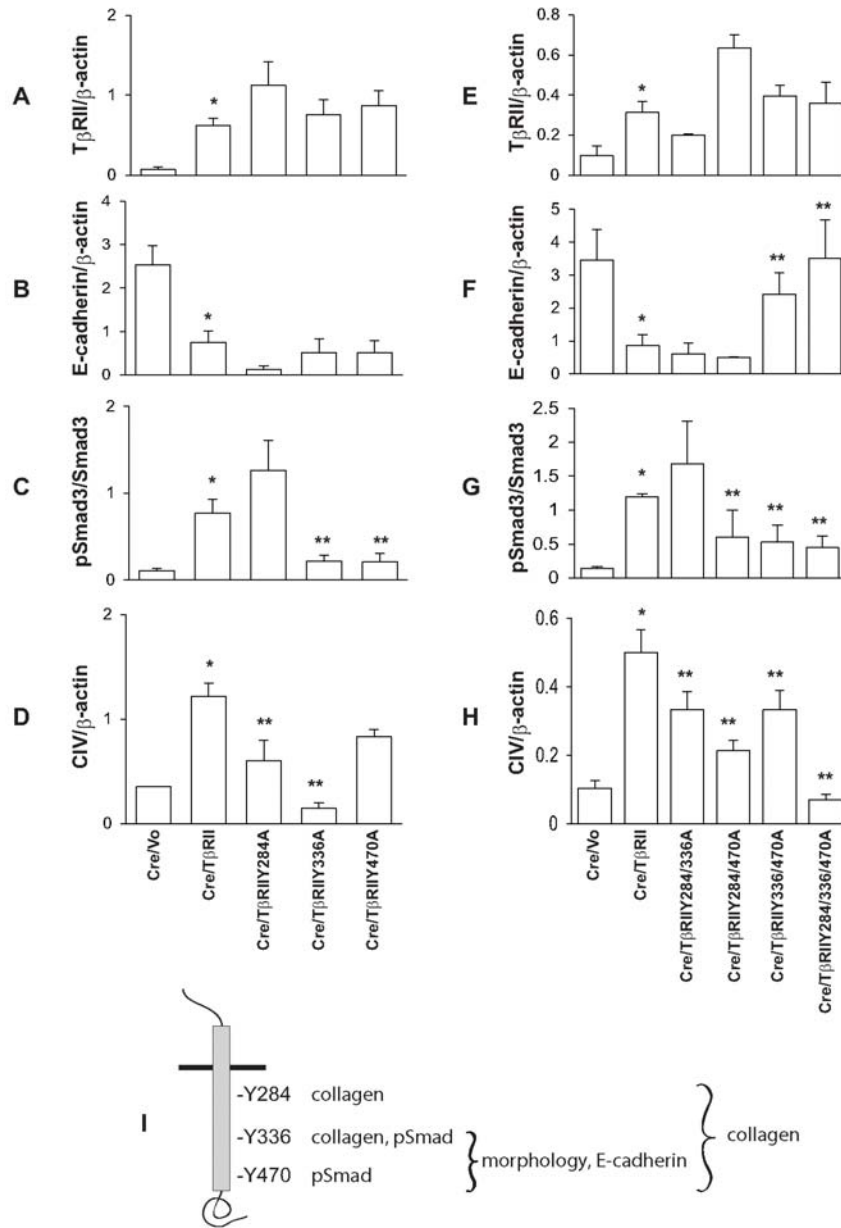

### Supplemental Figure 10

**Quantification of cell signaling regulated by T $\beta$ RII carrying single or multiple Y-to-A mutations in the TCPTP dephosphorylation sites Y284, Y336 or Y470.** (A-H) AdenoCre-treated  $\alpha$ 1KO/T $\beta$ RII<sup>fl/fl</sup> cells were transfected with empty vector (Cre/Vo), full-length T $\beta$ RII (Cre/T $\beta$ RII), or the Y-to-A T $\beta$ RII mutations indicated. Cell lysates (20  $\mu$ g/lane) from serum-starved cells were analyzed by Western blot for levels of T $\beta$ RII, E-cadherin, pSmad3 and collagen IV (CIV) as well as  $\beta$ -actin and total Smad3 (see Figures 9C, 9D). T $\beta$ RII, E-cadherin, CIV, and  $\beta$ -actin (A, B, D, E, F, H) as well as pSmad3 and Smad3 (C, G) bands were quantified by densitometry analysis and values are expressed as described in the Methods. Values are presented as mean  $\pm$  sem of three experiments. Differences between Cre/Vo and Cre/T $\beta$ RII cells (\*) or cells expressing wild type vs. Y-to-A mutated T $\beta$ RII (\*\*) were significant ( $p \leq 0.05$ ). (I) Schematic representation of the downstream targets and/or signaling regulated by Y284, Y336, and/or Y470 in the T $\beta$ RII cytoplasmic tail.
